# Supplementary material
Source: PubMed Central journal article supplement (PMC11558369)
Supplement: ajtr0016-5525-f5.pdf [file ajtr0016-5525-f5.pdf]

### 3D mapping of human lenses across different ages

**Supplementary Table 1.** Reagents, antibodies, equipment, and software

| Name                           | Cat. number      | Manufacturer                         |
|--------------------------------|------------------|--------------------------------------|
| <b>Reagent</b>                 |                  |                                      |
| 4% paraformaldehyde (PFA)      | CR10010          | Crystal-bio, China                   |
| PBS                            | C10010500BT      | Gibco, USA                           |
| Triton X-100                   | V900502          | Sigma-Aldrich, USA                   |
| Sodium azide                   | S2002            | Sigma-Aldrich, USA                   |
| <b>e-CLARITY</b>               |                  |                                      |
| Hydrogel solution              |                  |                                      |
| Acrylamide                     | v900845          | Vetec                                |
| Bisacrylamide                  | 0172             | Amresco                              |
| Photoinitiator VA044           | va-044/225-02111 | Wako                                 |
| 8% SDS solution                |                  |                                      |
| Sodium dodecyl sulfate         | 30166428         | Sinopharm Chemical Reagent           |
| Boric acid                     | 10004818         | Sinopharm Chemical Reagent           |
| Sodium hydroxide               | 10019718         | Sinopharm Chemical Reagent           |
| easyIndex                      | #EI-Z1011        | LifeCanvas                           |
| <b>CUBIC</b>                   |                  |                                      |
| CUBIC clearing solution        |                  |                                      |
| Urea                           | U5378            | Sigma-Aldrich, USA                   |
| Tetraethylenediamine           | 101129           | Crystal-bio, China                   |
| CUBIC scale solution           |                  |                                      |
| Sucrose                        | CR101108         | Crystal-bio, China                   |
| Triethanolamine                | 101109           | Crystal-bio, China                   |
| Mineral oil                    | m8410            | Sigma-Aldrich, USA                   |
| Silicone oil                   | TSF-437          | Shanghai Puxian, China               |
| <b>iDISCO</b>                  |                  |                                      |
| Methanol                       | 34860            | Sigma-Aldrich                        |
| DCM                            | 270997           | Sigma-Aldrich                        |
| H <sub>2</sub> O <sub>2</sub>  | D216763          | Sigma-Aldrich                        |
| Donkey serum                   | D9663            | Sigma-Aldrich                        |
| <b>PTwH</b>                    |                  |                                      |
| Glycine                        | G8898            | Sigma-Aldrich                        |
| DMSO                           | D8418            | Sigma-Aldrich                        |
| Tween-20                       | P9416            | Sigma-Aldrich                        |
| Heparin                        | 375095           | Milipore                             |
| Dibenzyl Ether                 | 33630            | Sigma-Aldrich                        |
| <b>Antibodies</b>              |                  |                                      |
| DAPI                           | D9542            | Sigma-Aldrich                        |
| PI                             | P1304MP          | Thermo Fisher Scientific             |
| TrKA                           | MA5-15509        | Invitrogen                           |
| ZO-1                           | 33-9100          | Invitrogen                           |
| <b>Equipment</b>               |                  |                                      |
| Constant temperature incubator | ZHLY-1803        | Shanghai Zhichu Instrument, China    |
| Light sheet microscope         | LS-18            | Nuohai Life Science Co., Ltd., China |
| Workstation                    | W-2245           | Intel                                |
| <b>Software</b>                |                  |                                      |
| Imaris                         | Imaris 9.7       | Bitplane, Switzerland                |
| MATLAB                         | R2016a           | MathWorks, USA                       |
| GraphPad Prism                 | version 8.0.2    | GraphPad                             |

### 3D mapping of human lenses across different ages

**Supplementary Table 2.** Tissue clearing and immunostaining methods for each individual lens

| Sample  | Tissue clearing method | Immunostaining methods |
|---------|------------------------|------------------------|
| 6 M     | iDISCO                 | DAPI, TrkA             |
| 17 Y    | iDISCO                 | DAPI, ZO-1             |
| 49 Y #1 | CUBIC                  | PI                     |
| 49 Y #2 | iDISCO                 | DAPI, ZO-1             |
| 72 Y #1 | CUBIC                  | PI                     |
| 72 Y #2 | e-CLARITY              | DAPI                   |

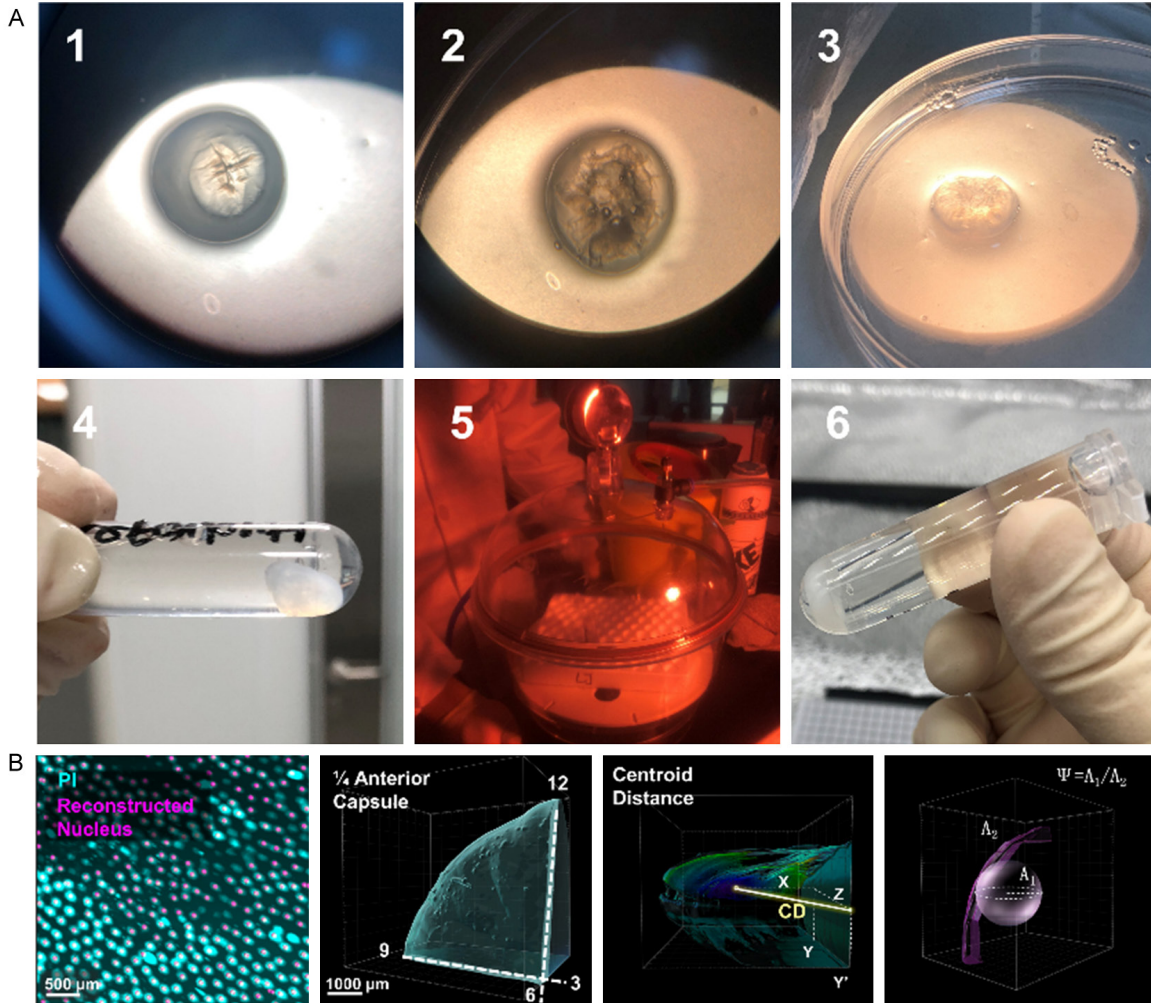

**Supplementary Figure 1.** Pretreatment with enucleation and subsequent e-CLARITY 3D-reconstruction. A. Pretreatment with enucleation in the e-CLARITY process. 1 - the isolated lens after removing the central 6 mm of the posterior capsule; 2 - the hollowed-out lens; 3 - the lens filled with hydrogel; 4 - sealing the lens in the Eppendorf tube with hydrogel; 5 - degassing with a vacuum desiccator; and 6 - solidified hydrogel containing the lens. B. Cellular 3D parameters are shown as a schematic diagram of definitions comparing the different ages and different lens parts, including the number of nuclei, the area, the centroid distance, and the sphericity.

# 3D mapping of human lenses across different ages

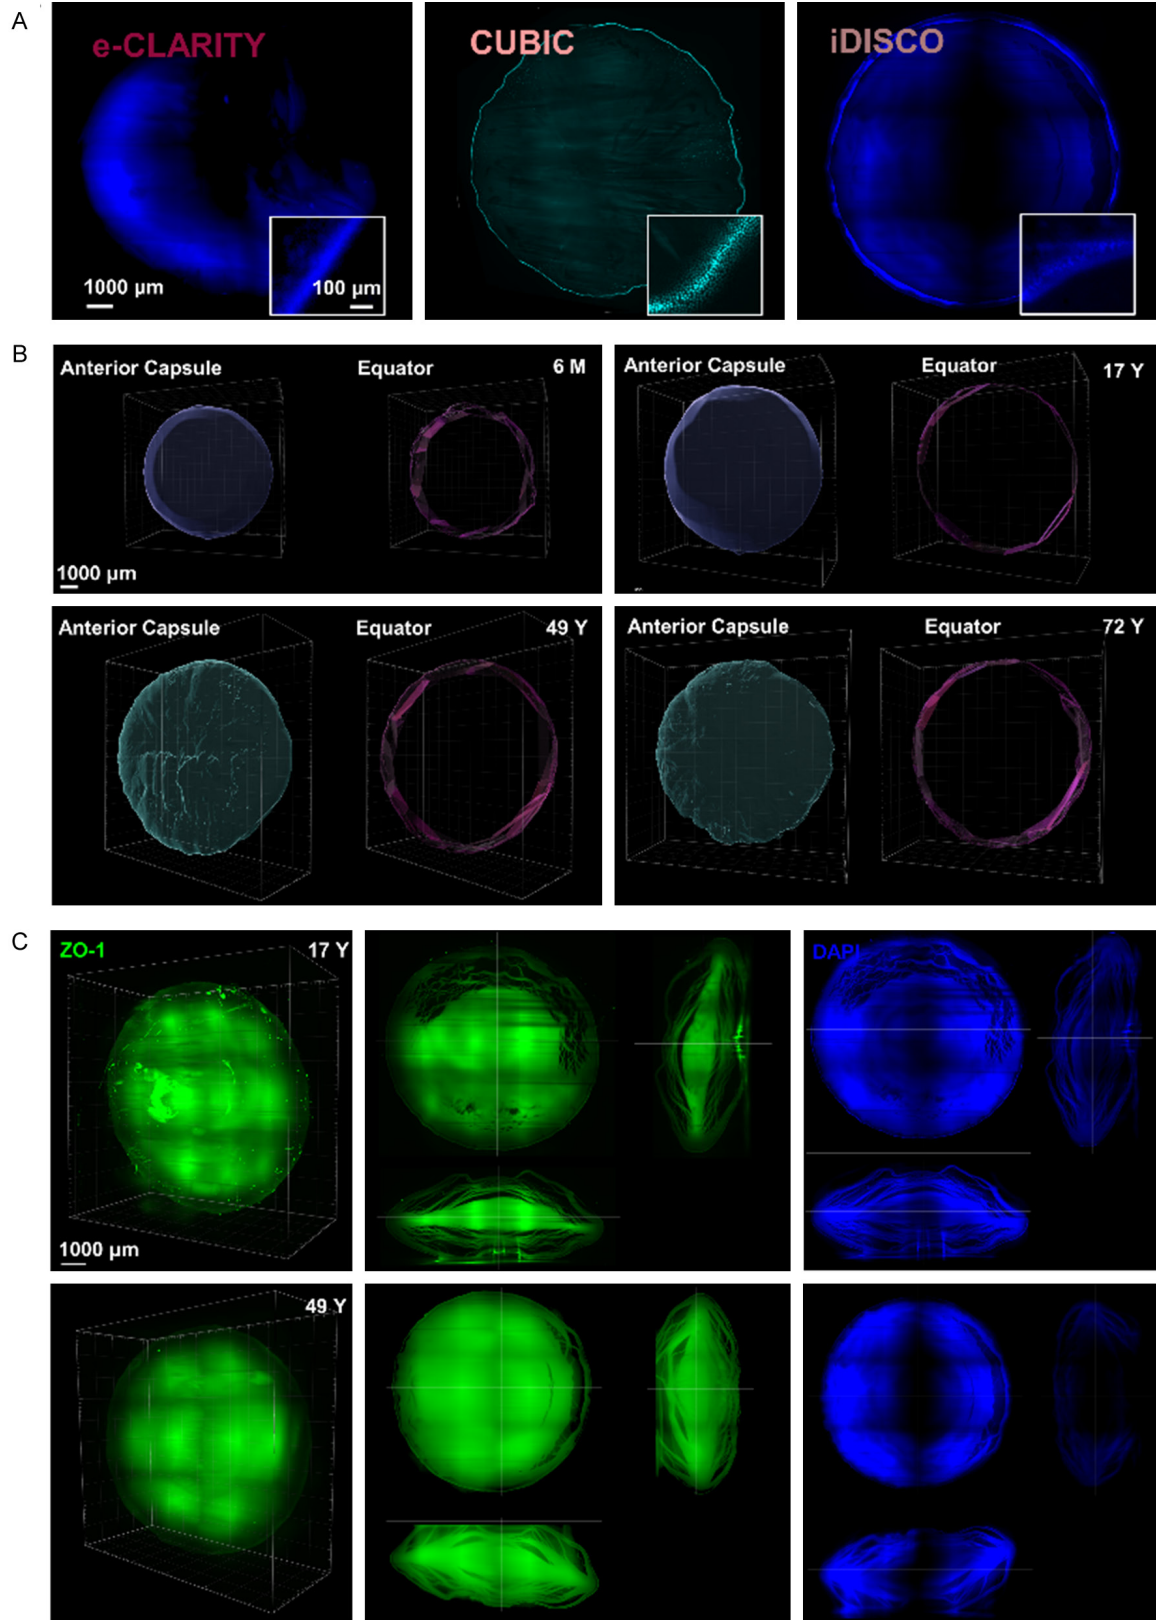

## 3D mapping of human lenses across different ages

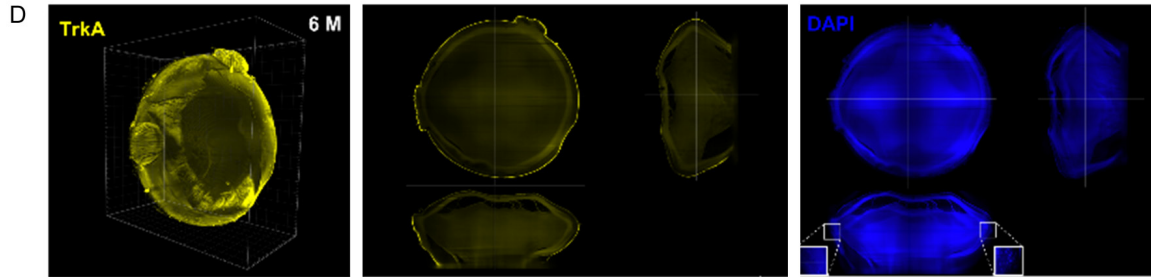

**Supplementary Figure 2.** Representative 3D views of the molecular and cellular maps of the human lens. A. Randomly chosen planes magnified to show the comparison of nuclear immunostaining efficacy (dark blue for DAPI and light blue for PI) using the different clearing methods. B. Reconstructed surface of the anterior capsule and equator of the 6 M, 17 Y, 49 Y, and 72 Y lenses. C. 3D view of ZO-1 (left) together with three views from the front, side, and top of ZO-1 (middle) and DAPI (right) in addition to the top panel for the 17 Y lens and the bottom panel for the 49 Y lens. D. 3D view of TrkA (left) together with three views from the front, side, and top for TrkA (middle), and DAPI (right) in the 6 M lens.
